# Supplementary material
Source: PubMed Central journal article supplement (PMC6432924)
Supplement: NIHMS1010278-supplement-Supplementary_Table_1_1.pdf [file NIHMS1010278-supplement-Supplementary_Table_1_1.pdf]

| Transcript Cluster ID | MET Bi-weight Avg Signal (log2) | SAL Bi-weight Avg Signal (log2) | Fold Change (linear) (MET vs. SAL) | ANOVA p-value (MET vs. SAL) | Gene Symbol   | Description                                                                                              |
|-----------------------|---------------------------------|---------------------------------|------------------------------------|-----------------------------|---------------|----------------------------------------------------------------------------------------------------------|
| 10464905              | 5.95                            | 7.2                             | -2.37                              | 0.000692                    | Npas4         | neuronal PAS domain protein 4                                                                            |
| 10429491              | 7.46                            | 8.38                            | -1.9                               | 0.011941                    | Arc           | activity regulated cytoskeletal-associated protein                                                       |
| 10449284              | 8.1                             | 8.93                            | -1.77                              | 0.009036                    | Dusp1         | dual specificity phosphatase 1                                                                           |
| 10397346              | 4.95                            | 5.77                            | -1.76                              | 0.01398                     | Fos           | FBJ osteosarcoma oncogene                                                                                |
| 10363735              | 5.66                            | 6.41                            | -1.68                              | 0.009506                    | Egr2          | early growth response 2                                                                                  |
| 10600122              | 4.68                            | 5.35                            | -1.59                              | 0.007179                    | Xlr3b         | X-linked lymphocyte-regulated 3B; X-linked lymphocyte-regulated 3C; X-linked lymphocyte-regulated 3A     |
| 10583887              | 7.65                            | 8.22                            | -1.49                              | 0.020036                    | Npsr1         | neuropeptide S receptor 1                                                                                |
| 10573867              | 6.97                            | 7.51                            | -1.46                              | 0.026192                    | Rbl2          | retinoblastoma-like 2                                                                                    |
| 10605007              | 4.6                             | 5.14                            | -1.45                              | 0.006674                    | Xlr3c         | X-linked lymphocyte-regulated 3C; X-linked lymphocyte-regulated 3B; X-linked lymphocyte-regulated 3A     |
| 10597913              | 5.84                            | 6.37                            | -1.44                              | 0.024744                    | 1110059G10Rik | RIKEN cDNA 1110059G10 gene                                                                               |
| 10453553              | 8.28                            | 8.81                            | -1.44                              | 0.029386                    | Gm1976        | predicted gene 1976                                                                                      |
| 10359851              | 8.21                            | 8.74                            | -1.43                              | 0.033478                    | Uck2          | uridine-cytidine kinase 2                                                                                |
| 10454782              | 8.87                            | 9.38                            | -1.42                              | 0.017186                    | Egr1          | early growth response 1                                                                                  |
| 10580282              | 6.43                            | 6.92                            | -1.41                              | 0.00777                     | Junb          | Jun-B oncogene                                                                                           |
| 10560826              | 6.25                            | 6.73                            | -1.4                               | 0.00164                     | Zfp109        | zinc finger protein 109                                                                                  |
| 10478283              | 4.15                            | 4.63                            | -1.39                              | 0.021615                    |               |                                                                                                          |
| 10351465              | 7.61                            | 8.07                            | -1.38                              | 0.022068                    | 1700084C01Rik | RIKEN cDNA 1700084C01 gene                                                                               |
| 10604996              | 4.77                            | 5.22                            | -1.37                              | 0.007553                    | Xlr3a         | X-linked lymphocyte-regulated 3A; X-linked lymphocyte-regulated 3C; X-linked lymphocyte-regulated 3B     |
| 10357875              | 6.43                            | 6.88                            | -1.36                              | 0.014316                    | Btg2          | B cell translocation gene 2, anti-proliferative                                                          |
| 10515930              | 6.24                            | 6.68                            | -1.36                              | 0.0182                      | AA415398      | expressed sequence AA415398                                                                              |
| 10408557              | 6.75                            | 7.16                            | -1.33                              | 0.012244                    |               |                                                                                                          |
| 10603702              | 9.5                             | 9.92                            | -1.33                              | 0.02845                     | Llph          | LLP homolog, long-term synaptic facilitation (Aplysia); predicted pseudogene 14535; predicted gene 12952 |
| 10515293              | 9.53                            | 9.93                            | -1.32                              | 0.022234                    | Llph          | LLP homolog, long-term synaptic facilitation (Aplysia); predicted pseudogene 14535; predicted gene 12952 |
| 10458641              | 5.83                            | 6.23                            | -1.32                              | 0.031073                    | Gpr151        | G protein-coupled receptor 151                                                                           |
| 10560818              | 6.21                            | 6.6                             | -1.31                              | 0.003929                    | Zfp111        | zinc finger protein 111                                                                                  |
| 10535034              | 8.11                            | 8.49                            | -1.3                               | 0.005528                    | Zfp68         | zinc finger protein 68                                                                                   |
| 10456904              | 6.91                            | 7.28                            | -1.29                              | 0.005804                    | Pstpip2       | proline-serine-threonine phosphatase-interacting protein 2                                               |

|          |      |      |       |          |               |                                                                                          |
|----------|------|------|-------|----------|---------------|------------------------------------------------------------------------------------------|
| 10550833 | 8.13 | 8.49 | -1.29 | 0.009853 | Zfp180        | zinc finger protein 180; zinc finger protein 180-like                                    |
| 10576532 | 8.2  | 8.57 | -1.29 | 0.03923  | Tsnax         | translin-associated factor X                                                             |
| 10549842 | 7.07 | 7.43 | -1.28 | 0.013806 | Zfp667        | zinc finger protein 667                                                                  |
| 10484307 | 8.01 | 8.36 | -1.28 | 0.019784 | Frzb          | frizzled-related protein                                                                 |
| 10377439 | 8.34 | 8.69 | -1.28 | 0.031875 | Per1          | period homolog 1 (Drosophila)                                                            |
| 10466521 | 5.75 | 6.11 | -1.28 | 0.048127 | Gcnt1         | glucosaminyl (N-acetyl) transferase 1, core 2                                            |
| 10348932 | 7.16 | 7.51 | -1.27 | 0.007434 | Gin1          | gypsy retrotransposon integrase 1                                                        |
| 10408902 | 7.47 | 7.82 | -1.27 | 0.02589  | Ccdc90a       | coiled-coil domain containing 90A                                                        |
| 10381697 | 7.62 | 7.95 | -1.26 | 0.041933 | Hexim1        | hexamethylene bis-acetamide inducible 1                                                  |
| 10515399 | 6.7  | 7.01 | -1.25 | 0.004299 | Plk3          | polo-like kinase 3                                                                       |
| 10417713 | 7.59 | 7.91 | -1.25 | 0.005036 | Rarb          | retinoic acid receptor, beta                                                             |
| 10356626 | 8.83 | 9.15 | -1.25 | 0.02981  |               |                                                                                          |
| 10401829 | 6.76 | 7.08 | -1.25 | 0.048457 | Gm8300        | predicted gene 8300; predicted gene 5662; predicted pseudogene 2022; predicted gene 2016 |
| 10549899 | 7.2  | 7.51 | -1.24 | 0.008761 | Zfp418        | zinc finger protein 418                                                                  |
| 10548038 | 6.92 | 7.23 | -1.24 | 0.04814  | Ntf3          | neurotrophin 3                                                                           |
| 10480027 | 6.08 | 6.38 | -1.23 | 0.015752 | Zbtb2         | zinc finger and BTB domain containing 2                                                  |
| 10472589 | 7.25 | 7.56 | -1.23 | 0.034572 | Phospho2      | phosphatase, orphan 2                                                                    |
| 10480057 | 7.56 | 7.86 | -1.23 | 0.035262 | Rbm17         | RNA binding motif protein 17                                                             |
| 10600031 | 4.17 | 4.48 | -1.23 | 0.045844 | Vma21         | VMA21 vacuolar H+ATPase homolog (S. cerevisiae)                                          |
| 10403081 | 5.89 | 6.18 | -1.22 | 0.009813 | Wdr60         | WD repeat domain 60                                                                      |
| 10397891 | 5.61 | 5.9  | -1.22 | 0.012233 | D230037D09Rik | RIKEN cDNA D230037D09 gene                                                               |
| 10401443 | 7.19 | 7.48 | -1.22 | 0.024237 | Fam161b       | family with sequence similarity 161, member B                                            |
| 10605493 | 6.84 | 7.13 | -1.22 | 0.026416 | Prrg1         | proline rich Gla (G-carboxyglutamic acid) 1                                              |
| 10455054 | 6.66 | 6.94 | -1.22 | 0.037221 | Pcdhb3        | protocadherin beta 3                                                                     |
| 10473230 | 7.38 | 7.66 | -1.22 | 0.045182 | Nup35         | nucleoporin 35                                                                           |
| 10412900 | 9.4  | 9.67 | -1.21 | 0.00218  | Nkiras1       | NFKB inhibitor interacting Ras-like protein 1                                            |
| 10601771 | 9.47 | 9.74 | -1.21 | 0.005983 | Armcx1        | armadillo repeat containing, X-linked 1                                                  |
| 10459512 | 6.6  | 6.88 | -1.21 | 0.009921 | Mc4r          | melanocortin 4 receptor                                                                  |
| 10589099 | 7.82 | 8.1  | -1.21 | 0.013194 | Ip6k2         | inositol hexaphosphate kinase 2                                                          |
| 10505623 | 7.4  | 7.67 | -1.21 | 0.018298 | D4Bwg0951e    | DNA segment, Chr 4, Brigham & Women's Genetics 0951 expressed                            |
| 10582669 | 6.89 | 7.16 | -1.21 | 0.018395 | Ttc13         | tetratricopeptide repeat domain 13                                                       |
| 10586176 | 6.9  | 7.18 | -1.21 | 0.022391 | Snpc5         | small nuclear RNA activating complex, polypeptide 5                                      |
| 10362968 | 5.76 | 6.04 | -1.21 | 0.022682 | Bves          | blood vessel epicardial substance                                                        |
| 10356601 | 7.05 | 7.31 | -1.21 | 0.034899 | Per2          | period homolog 2 (Drosophila)                                                            |
| 10404404 | 4.9  | 5.17 | -1.21 | 0.035722 | Foxf2         | forkhead box F2                                                                          |

|          |      |      |       |          |         |                              |
|----------|------|------|-------|----------|---------|------------------------------|
| 10524004 | 8.17 | 8.45 | -1.21 | 0.039178 | Pcgf3   | polycomb group ring finger 3 |
| 10368090 | 4.68 | 4.95 | -1.21 | 0.04157  |         |                              |
| 10578962 | 5.3  | 5.57 | -1.21 | 0.042686 | Gm10661 | predicted gene 10661         |
| 10434289 | 5.48 | 5.75 | -1.21 | 0.049941 |         |                              |
