# Supplementary material
Source: PubMed Central journal article supplement (PMC6432924)
Supplement: NIHMS1010278-supplement-Supplementary_Table_1_2.pdf [file NIHMS1010278-supplement-Supplementary_Table_1_2.pdf]

| Transcript Cluster ID | MET Bi-weight Avg Signal (log2) | SAL Bi-weight Avg Signal (log2) | Fold Change (linear) (MET vs. SAL) | ANOVA p-value (MET vs. SAL) | Gene Symbol   | Description                                                     |
|-----------------------|---------------------------------|---------------------------------|------------------------------------|-----------------------------|---------------|-----------------------------------------------------------------|
| 10458560              | 8.23                            | 7.12                            | 2.17                               | 0.04005                     | Fgf1          | fibroblast growth factor 1                                      |
| 10508719              | 7.33                            | 6.45                            | 1.84                               | 0.045515                    | Snora16a      | small nucleolar RNA, H/ACA box 16A                              |
| 10410362              | 7.52                            | 6.68                            | 1.78                               | 0.015996                    | Zfp738        | zinc finger protein 738                                         |
| 10516906              | 8.96                            | 8.39                            | 1.49                               | 0.025634                    | Snora73b      | small nucleolar RNA, H/ACA box 73b                              |
| 10580077              | 7.29                            | 6.74                            | 1.46                               | 0.044445                    | Rln3          | relaxin 3                                                       |
| 10398338              | 6.57                            | 6.03                            | 1.45                               | 0.041128                    | Mir665        | microRNA 665                                                    |
| 10411454              | 6.57                            | 6.04                            | 1.44                               | 0.004069                    | Sec61b        | Sec61 beta subunit                                              |
| 10608699              | 8.29                            | 7.77                            | 1.44                               | 0.02862                     | Noc2l         | nucleolar complex associated 2 homolog ( <i>S. cerevisiae</i> ) |
| 10398426              | 7.28                            | 6.78                            | 1.41                               | 0.006827                    | Mir485        | microRNA 485; miRNA containing gene                             |
| 10470768              | 7.46                            | 6.97                            | 1.41                               | 0.040507                    | Urm1          | ubiquitin related modifier 1 homolog ( <i>S. cerevisiae</i> )   |
| 10598203              | 5.94                            | 5.45                            | 1.4                                | 0.035818                    | Ccl28         | chemokine (C-C motif) ligand 28                                 |
| 10608689              | 9.28                            | 8.8                             | 1.39                               | 0.022267                    |               |                                                                 |
| 10375127              | 6.11                            | 5.65                            | 1.37                               | 0.031856                    | 1700072H12Rik | RIKEN cDNA 1700072H12 gene                                      |
| 10465831              | 7.22                            | 6.78                            | 1.36                               | 0.007574                    | 5730408K05Rik | RIKEN cDNA 5730408K05 gene                                      |
| 10596190              | 5.9                             | 5.45                            | 1.36                               | 0.013023                    | Bfsp2         | beaded filament structural protein 2, phakinin                  |
| 10376885              | 9.42                            | 8.97                            | 1.36                               | 0.021461                    | Snord49b      | small nucleolar RNA, C/D box 49B                                |
| 10398727              | 10.26                           | 9.82                            | 1.35                               | 0.042803                    | Klc1          | kinesin light chain 1                                           |
| 10487645              | 6.04                            | 5.62                            | 1.34                               | 0.014879                    | Cpxm1         | carboxypeptidase X 1 (M14 family)                               |
| 10563961              | 6.99                            | 6.6                             | 1.31                               | 0.008838                    |               |                                                                 |
| 10560311              | 5.74                            | 5.34                            | 1.31                               | 0.019417                    |               |                                                                 |
| 10350742              | 5.39                            | 5.01                            | 1.31                               | 0.025608                    | Rnasel        | ribonuclease L (2', 5'-oligoadenylate synthetase-dependent)     |
| 10563919              | 8.64                            | 8.26                            | 1.3                                | 0.000502                    |               |                                                                 |
| 10424860              | 8.42                            | 8.05                            | 1.3                                | 0.014228                    | Heatr7a       | HEAT repeat containing 7A                                       |
| 10505917              | 5.71                            | 5.34                            | 1.3                                | 0.047962                    |               |                                                                 |
| 10526838              | 6.64                            | 6.27                            | 1.29                               | 0.017813                    | Got2          | glutamate oxaloacetate transaminase 2, mitochondrial            |
| 10445741              | 5.42                            | 5.08                            | 1.26                               | 0.002836                    |               |                                                                 |
| 10470816              | 8.32                            | 7.98                            | 1.26                               | 0.035061                    | Gle1          | GLE1 RNA export mediator (yeast)                                |
| 10491695              | 4.84                            | 4.51                            | 1.26                               | 0.04403                     | Bbs12         | Bardet-Biedl syndrome 12 (human)                                |
| 10411167              | 5.22                            | 4.89                            | 1.26                               | 0.049527                    |               |                                                                 |
| 10435305              | 8.78                            | 8.46                            | 1.25                               | 0.000582                    | Itgb5         | integrin beta 5                                                 |
| 10427718              | 7.85                            | 7.54                            | 1.25                               | 0.026473                    | Brix1         | BRX1, biogenesis of ribosomes, homolog ( <i>S. cerevisiae</i> ) |
| 10488912              | 7.33                            | 7.01                            | 1.25                               | 0.039039                    | Edem2         | ER degradation enhancer, mannosidase alpha-like 2               |

|          |       |       |      |          |          |                                                                                                             |
|----------|-------|-------|------|----------|----------|-------------------------------------------------------------------------------------------------------------|
| 10364402 | 7.78  | 7.46  | 1.25 | 0.047364 | Slc1a6   | solute carrier family 1 (high affinity aspartate/glutamate transporter), member 6                           |
| 10359917 | 7.52  | 7.21  | 1.24 | 0.001646 | Hsd17b7  | hydroxysteroid (17-beta) dehydrogenase 7                                                                    |
| 10347335 | 6.26  | 5.95  | 1.24 | 0.008124 | Slc11a1  | solute carrier family 11 (proton-coupled divalent metal ion transporters), member 1                         |
| 10553475 | 7.62  | 7.31  | 1.24 | 0.01694  | Rps27a   | ribosomal protein S27A                                                                                      |
| 10479217 | 9.04  | 8.72  | 1.24 | 0.038827 | Gm14420  | predicted gene 14420                                                                                        |
| 10414990 | 4.94  | 4.62  | 1.24 | 0.0452   |          |                                                                                                             |
| 10537406 | 9.08  | 8.77  | 1.24 | 0.048642 | Clec2l   | C-type lectin domain family, member L                                                                       |
| 10597309 | 5.22  | 4.92  | 1.23 | 0.002467 | Stac     | src homology three (SH3) and cysteine rich domain                                                           |
| 10577219 | 4.19  | 3.89  | 1.23 | 0.003426 | AF366264 | cDNA sequence AF366264                                                                                      |
| 10489204 | 6.6   | 6.3   | 1.23 | 0.02806  | Tgm2     | transglutaminase 2, C polypeptide                                                                           |
| 10424853 | 7.19  | 6.9   | 1.23 | 0.036385 | Fam203a  | family with sequence similarity 203, member A                                                               |
| 10582562 | 10.97 | 10.69 | 1.22 | 0.013583 |          |                                                                                                             |
| 10460735 | 4.88  | 4.6   | 1.22 | 0.014254 | BC048609 | cDNA sequence BC048609                                                                                      |
| 10569069 | 9.87  | 9.59  | 1.22 | 0.015903 |          |                                                                                                             |
| 10444685 | 8.59  | 8.3   | 1.22 | 0.031102 | Abhd16a  | abhydrolase domain containing 16A                                                                           |
| 10563101 | 10.82 | 10.55 | 1.21 | 0.006816 | Rpl13a   | ribosomal protein L13A                                                                                      |
| 10510034 | 7.15  | 6.87  | 1.21 | 0.007333 | Casp9    | caspase 9                                                                                                   |
| 10551319 | 7.19  | 6.92  | 1.21 | 0.008999 | Adck4    | aarF domain containing kinase 4                                                                             |
| 10406541 | 8.79  | 8.52  | 1.21 | 0.013597 | Rps23    | ribosomal protein S23; predicted gene 5148                                                                  |
| 10457020 | 7.28  | 7.01  | 1.21 | 0.014711 |          |                                                                                                             |
| 10473551 | 3.76  | 3.49  | 1.21 | 0.018223 | Olfr153  | olfactory receptor 153                                                                                      |
| 10605143 | 6.07  | 5.8   | 1.21 | 0.026364 | Arhgap4  | Rho GTPase activating protein 4                                                                             |
| 10601848 | 8.21  | 7.93  | 1.21 | 0.036126 | Arxes1   | adipocyte-related X-chromosome expressed sequence 1;<br>adipocyte-related X-chromosome expressed sequence 2 |
| 10396936 | 7.66  | 7.39  | 1.21 | 0.039558 | Smoc1    | SPARC related modular calcium binding 1                                                                     |
